# Supplementary material for: Association between multimorbidity, self-rated health and life satisfaction among independent, community-dwelling very old persons in Japan: longitudinal cohort analysis from the Kawasaki Ageing and Well-being Project
Source: HighWire-hosted journal article supplement (doi:10.1136/bmjopen-2021-049262), 2022-02-01
Supplement: bmjopen-2021-049262supp001_data_supplement.pdf [file bmjopen-2021-049262supp001_data_supplement.pdf]

## Supplementary Material

Supplementary Figure 1:

Sex difference in prevalence of each chronic condition.

Supplementary Table 1:

Classification of 18 conditions and the corresponding ICD-10 codes.

Supplementary Table 2a:

Odds ratio of baseline characteristics on poor self-rated health in female and male participants.

Supplementary Table 2b:

Odds ratio of baseline characteristics on low life satisfaction in female and male participants.

Supplementary Table 3a:

Condition specific effect on poor self-rated health in female and male participants.

Supplementary Table 3b:

Condition specific effect on low life satisfaction in female and male participants.

Supplementary Figure 1. Sex difference in prevalence of each chronic condition.

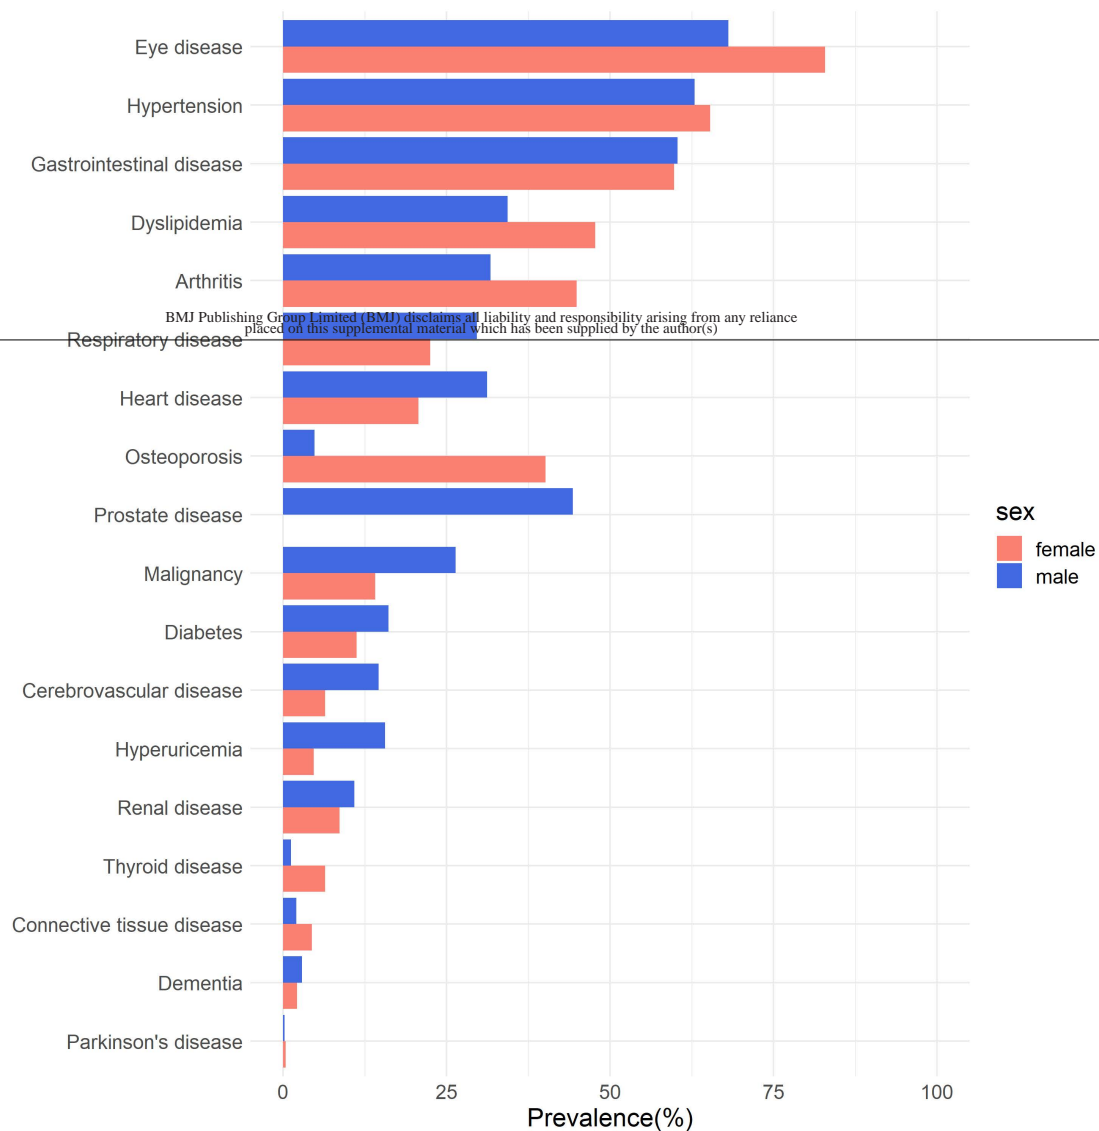

Supplemental material

BMJ Publishing Group Limited (BMJ) disclaims all liability and responsibility arising from any reliance placed on this supplemental material which has been supplied by the author(s)

BMJ Open

Following conditions showed statistically significant differences between the sexes in the chi-square test: diabetes, dyslipidemia, hyperuricemia, cerebrovascular disease, heart disease, respiratory disease, thyroid disease, connective tissue disease, osteoporosis, arthritis, eye disease and malignancy.

Supplementary Table 1. Classification of 18 conditions and the corresponding ICD-10 codes.

| Classification            | Example                                                                              | ICD-10 codes                                                            |
|---------------------------|--------------------------------------------------------------------------------------|-------------------------------------------------------------------------|
| Cerebrovascular disease   | Ischemic stroke, intracranial bleeding, transient ischemic attack, subdural hematoma | I60-I69                                                                 |
| Cardiac disease           | Heart failure, angina, myocardial infarction, atrial fibrillation, valvular disease  | I20-I25                                                                 |
| Hypertension              | Essential hypertension                                                               | I10-I15                                                                 |
| Diabetes                  | Type2 diabetes mellitus,                                                             | E10-14                                                                  |
| Dyslipidemia              | Hyperlipidemia, hypertriglycemia                                                     | E78                                                                     |
| Respiratory disease       | Asthma, COPD, Tuberculosis                                                           | A15-16, J40-47, J60-7, J80-84,                                          |
| Gastrointestinal disease  | Gastroesophageal reflux disease, gastritis, peptic ulcer disease, hepatitis,         | K20-K31, K35-K38, K40-K46, K50-K52, K55-K64, K70-K77, K80-K87, K90-K93, |
| Renal disease             | Chronic kidney disease, End stage renal disease, Nephritis                           | N00-N08, N10-N16, N17-N19, N25-N29                                      |
| Prostate disease          | Benign prostate hyperplasia                                                          | N40-N51                                                                 |
| Thyroid disease           | Hyperthyroidism(Grave's disease), Hypothyroidism(Hashimoto's disease)                | E00-E07                                                                 |
| Parkinson's disease       |                                                                                      | G20-G22                                                                 |
| Connective tissue disease | Rheumatoid arthritis, Systemic Lupus Erythematosus,                                  | M05-M14, M30-M36,                                                       |
| Eye disease               | Glaucoma, Cataract, Dry eye                                                          | H10-H13, H15-H22, H25-H28, H30-H36, H40-H59                             |
| Osteoporosis              | Postmenopausal osteoporosis                                                          | M80-M82                                                                 |
| Arthritis                 | Osteoarthritis                                                                       | M15-M19                                                                 |
| Hyperuricemia             | Asymptomatic hyperuricemia, Gout                                                     | E79, M10                                                                |
| Malignancy                | Any kinds of malignancy                                                              | C00-C97                                                                 |
| Dementia                  | Alzheimer's disease, Dementia with Lewy Bodies                                       | F00-F03                                                                 |

Supplementary Table 2a. Odds ratio of baseline characteristics on poor self-rated health in female and male participants.

|                              | Poor Self-rated health |         |                    |         |                    |         |                    |         |
|------------------------------|------------------------|---------|--------------------|---------|--------------------|---------|--------------------|---------|
|                              | female                 |         |                    |         | male               |         |                    |         |
|                              | unadjusted             |         | adjusted           |         | unadjusted         |         | adjusted           |         |
|                              | OR(95%CI)              | P value | OR(95%CI)          | P value | OR(95%CI)          | P value | OR(95%CI)          | P value |
| Age                          | 0.85(0.69-1.04)        | 0.115   | 0.81(0.64-1.04)    | 0.096   | 1.00(0.84-1.19)    | 0.966   | 0.96(0.78-1.18)    | 0.714   |
| BMI                          |                        |         |                    |         |                    |         |                    |         |
| <18.5                        | 1.05(0.42-2.63)        | 0.913   | 0.98(0.32-3.03)    | 0.971   | 0.98(0.28-3.47)    | 0.973   | 1.45(0.35-6.03)    | 0.610   |
| 18-25                        | Reference              |         | Reference          |         | Reference          |         | Reference          |         |
| 25≤                          | 0.63(0.32-1.26)        | 0.195   | 0.67(0.30-1.49)    | 0.328   | 1.01(0.59-1.72)    | 0.975   | 0.77(0.41-1.44)    | 0.413   |
| Current Drinking             | 0.94(0.50-1.77)        | 0.838   | 1.24(0.60-2.55)    | 0.559   | 0.69(0.43-1.12)    | 0.135   | 0.95(0.54-1.67)    | 0.853   |
| Current Smoking              | 3.63(0.65-20.26)       | 0.141   | 1.10(0.10-12.77)   | 0.938   | 0.86(0.32-2.29)    | 0.762   | 0.77(0.25-2.37)    | 0.646   |
| Education (<12 years)        | 1.05(0.60-1.85)        | 0.853   | 1.43(0.71-2.87)    | 0.318   | 1.45(0.90-2.33)    | 0.128   | 1.45(0.82-2.55)    | 0.203   |
| IADL( Dependent)             | 1.75(0.90-3.43)        | 0.101   | 1.52(0.66-3.50)    | 0.320   | 2.57(1.41-4.68)    | 0.002   | 2.36(1.18-4.75)    | 0.016   |
| Frailty                      |                        |         |                    |         |                    |         |                    |         |
| Robust                       | Reference              |         | Reference          |         | Reference          |         | Reference          |         |
| Prefrail                     | 2.64(0.92-7.58)        | 0.072   | 3.37(1.06-10.72)   | 0.040   | 0.64(0.34-1.22)    | 0.180   | 0.51(0.25-1.05)    | 0.066   |
| Frail                        | 5.13(1.59-16.63)       | 0.006   | 5.70(1.52-21.37)   | 0.010   | 1.32(0.60-2.90)    | 0.485   | 0.70(0.27-1.79)    | 0.453   |
| GDS                          |                        |         |                    |         |                    |         |                    |         |
| 0-4                          | Reference              |         | Reference          |         | Reference          |         | Reference          |         |
| 5-9                          | 3.72(2.10-6.62)        | <0.001  | 3.36(1.71-6.63)    | <0.001  | 1.98(1.16-3.39)    | 0.013   | 2.01(1.08-3.75)    | 0.028   |
| 10-15                        | 5.93(1.90-18.52)       | 0.002   | 4.20(0.97-18.12)   | 0.055   | 6.56(2.73-15.77)   | <0.001  | 9.32(3.02-28.76)   | <0.001  |
| Number of chronic conditions |                        |         |                    |         |                    |         |                    |         |
| 0-1                          | Reference              |         | Reference          |         | Reference          |         | Reference          |         |
| 2                            | 0.18(0.02-2.07)        | 0.168   | 0.36(0.03-4.42)    | 0.425   | 0.66(0.09-4.94)    | 0.685   | 0.71(0.05-9.14)    | 0.792   |
| 3                            | 1.02(0.20-5.19)        | 0.977   | 1.64(0.30-9.01)    | 0.567   | 0.75(0.13-4.34)    | 0.751   | 1.46(0.15-14.03)   | 0.742   |
| 4                            | 1.02(0.20-5.19)        | 0.977   | 1.06(0.19-6.04)    | 0.950   | 1.43(0.29-7.14)    | 0.661   | 2.37(0.27-20.49)   | 0.433   |
| 5                            | 0.87(0.17-4.37)        | 0.862   | 1.15(0.20-6.50)    | 0.872   | 3.44(0.75-15.71)   | 0.110   | 5.27(0.65-42.45)   | 0.118   |
| 6                            | 1.78(0.36-8.80)        | 0.480   | 2.69(0.50-14.61)   | 0.252   | 5.40(1.17-24.86)   | 0.030   | 9.13(1.12-74.41)   | 0.039   |
| 7                            | 4.34(0.88-21.49)       | 0.072   | 7.43(1.35-40.93)   | 0.021   | 5.30(1.13-25.00)   | 0.035   | 7.51(0.90-62.67)   | 0.062   |
| 8                            | 8.17(1.41-47.22)       | 0.019   | 12.32(1.90-79.71)  | 0.008   | 5.58(0.95-32.59)   | 0.056   | 7.72(0.75-79.93)   | 0.087   |
| 9 or more                    | 15.75(2.30-107.93)     | 0.005   | 27.86(3.54-218.99) | 0.002   | 16.92(2.79-102.40) | 0.002   | 59.41(5.41-652.67) | 0.001   |

Abbreviations: OR, Odds ratio; CI, Confidence interval; IADL, Instrumental activities of daily living; GDS, Geriatric Depression Scale

Supplementary Table 2b. Odds ratio of baseline characteristics on low life satisfaction in female and male participants.

|                              | Low life satisfaction |         |                   |         |                  |         |                   |         |
|------------------------------|-----------------------|---------|-------------------|---------|------------------|---------|-------------------|---------|
|                              | female                |         |                   |         | male             |         |                   |         |
|                              | unadjusted            |         | adjusted          |         | unadjusted       |         | adjusted          |         |
|                              | OR(95%CI)             | P value | OR(95%CI)         | P value | OR(95%CI)        | P value | OR(95%CI)         | P value |
| Age                          | 0.83(0.69-0.99)       | 0.042   | 0.82(0.66-1.02)   | 0.071   | 1.08(0.92-1.28)  | 0.344   | 1.06(0.87-1.27)   | 0.576   |
| BMI                          |                       |         |                   |         |                  |         |                   |         |
| <18.5                        | 0.24(0.05-1.01)       | 0.052   | 0.10(0.01-0.86)   | 0.036   | 2.25(0.83-6.15)  | 0.112   | 2.56(0.86-7.64)   | 0.091   |
| 18-25                        | Reference             |         | Reference         |         | Reference        |         | Reference         |         |
| 25≤                          | 0.60(0.33-1.12)       | 0.107   | 0.70(0.36-1.38)   | 0.304   | 0.59(0.33-1.05)  | 0.072   | 0.64(0.34-1.21)   | 0.169   |
| Current Drinking             | 0.72(0.39-1.33)       | 0.292   | 0.77(0.39-1.51)   | 0.447   | 1.04(0.65-1.65)  | 0.882   | 1.20(0.71-2.04)   | 0.501   |
| Current Smoking              | 2.71(0.45-16.49)      | 0.279   | 0.25(0.01-6.73)   | 0.409   | 2.96(1.38-6.35)  | 0.005   | 1.96(0.83-4.63)   | 0.124   |
| Education (<12 years)        | 1.03(0.63-1.70)       | 0.897   | 1.17(0.64-2.14)   | 0.602   | 1.31(0.82-2.08)  | 0.253   | 1.12(0.66-1.91)   | 0.664   |
| IADL( Dependent)             | 0.76(0.35-1.62)       | 0.469   | 1.68(0.71-3.99)   | 0.240   | 0.70(0.31-1.54)  | 0.372   | 1.66(0.68-4.03)   | 0.265   |
| Frailty                      |                       |         |                   |         |                  |         |                   |         |
| Robust                       | Reference             |         | Reference         |         | Reference        |         | Reference         |         |
| Prefrail                     | 1.10(0.55-2.20)       | 0.779   | 0.99(0.47-2.09)   | 0.986   | 1.42(0.70-2.87)  | 0.331   | 1.13(0.52-2.43)   | 0.764   |
| Frail                        | 1.96(0.81-4.72)       | 0.135   | 1.53(0.57-4.12)   | 0.401   | 2.04(0.86-4.81)  | 0.105   | 1.18(0.44-3.15)   | 0.737   |
| GDS                          |                       |         |                   |         |                  |         |                   |         |
| 0-4                          | Reference             |         | Reference         |         | Reference        |         | Reference         |         |
| 5-9                          | 2.67(1.52-4.67)       | 0.001   | 2.45(1.28-4.66)   | 0.007   | 3.58(2.11-6.08)  | <0.001  | 3.32(1.86-5.93)   | <0.001  |
| 10-15                        | 15.04(3.85-58.74)     | <0.001  | 15.48(3.58-66.90) | <0.001  | 9.31(3.23-26.80) | <0.001  | 13.27(3.79-46.47) | <0.001  |
| Number of chronic conditions |                       |         |                   |         |                  |         |                   |         |
| 0-1                          | Reference             |         | Reference         |         | Reference        |         | Reference         |         |
| 2                            | 0.39(0.12-1.30)       | 0.126   | 0.46(0.13-1.72)   | 0.251   | 1.06(0.26-4.44)  | 0.931   | 0.94(0.20-4.45)   | 0.935   |
| 3                            | 0.33(0.10-1.06)       | 0.063   | 0.40(0.11-1.42)   | 0.155   | 1.44(0.43-4.83)  | 0.557   | 1.34(0.36-4.98)   | 0.659   |
| 4                            | 0.48(0.15-1.54)       | 0.219   | 0.43(0.12-1.56)   | 0.202   | 1.53(0.46-5.07)  | 0.484   | 1.46(0.40-5.35)   | 0.570   |
| 5                            | 0.39(0.12-1.21)       | 0.103   | 0.34(0.10-1.18)   | 0.088   | 2.49(0.78-7.93)  | 0.122   | 1.90(0.54-6.64)   | 0.315   |
| 6                            | 0.43(0.13-1.43)       | 0.167   | 0.41(0.11-1.55)   | 0.191   | 1.62(0.48-5.54)  | 0.438   | 1.62(0.43-6.13)   | 0.475   |
| 7                            | 0.51(0.14-1.88)       | 0.315   | 0.38(0.09-1.59)   | 0.184   | 1.48(0.41-5.37)  | 0.552   | 1.28(0.31-5.28)   | 0.731   |
| 8                            | 1.37(0.32-5.88)       | 0.667   | 1.62(0.35-7.63)   | 0.539   | 1.44(0.28-7.50)  | 0.667   | 1.46(0.21-9.99)   | 0.701   |
| 9 or more                    | 1.37(0.23-8.30)       | 0.728   | 1.85(0.25-13.83)  | 0.550   | 2.16(0.39-11.80) | 0.376   | 3.14(0.45-21.75)  | 0.246   |

Abbreviations: OR, Odds ratio; CI, Confidence interval; IADL, Instrumental activities of daily living; GDS, Geriatric Depression Scale

Supplementary Table 3a. Condition specific effect on poor self-rated health in female and male participants.

|                           | Poor Self-rated health |         |                  |         |                 |         |                 |         |
|---------------------------|------------------------|---------|------------------|---------|-----------------|---------|-----------------|---------|
|                           | Female                 |         |                  |         | Male            |         |                 |         |
|                           | Unadjusted             |         | Adjusted         |         | Unadjusted      |         | Adjusted        |         |
|                           | OR(95%CI)              | P value | OR(95%CI)        | P value | OR(95%CI)       | P value | OR(95%CI)       | P value |
| Hypertension              | 1.48(0.82-2.67)        | 0.195   | -                | -       | 1.48(0.88-2.48) | 0.136   | -               | -       |
| Diabetes                  | 1.25(0.56-2.79)        | 0.586   | -                | -       | 1.41(0.77-2.60) | 0.267   | -               | -       |
| Dyslipidemia              | 1.74(1.02-3.00)        | 0.044   | 1.55(0.75-3.19)  | 0.233   | 1.73(1.06-2.80) | 0.027   | 1.34(0.73-2.44) | 0.342   |
| Hyperuricemia             | 5.51(2.27-13.39)       | <0.001  | 4.55(1.32-15.74) | 0.017   | 1.25(0.66-2.37) | 0.490   | -               | -       |
| Cerebrovascular disease   | 2.57(1.10-6.00)        | 0.029   | 3.05(1.05-8.85)  | 0.040   | 3.68(2.11-6.42) | <0.001  | 2.90(1.48-5.68) | 0.002   |
| Parkinson's disease       | NA                     | NA      | -                | -       | NA              | NA      | -               | -       |
| Dementia                  | NA                     | NA      | -                | -       | 0.91(0.20-4.15) | 0.903   | -               | -       |
| Heart disease             | 2.02(1.13-3.62)        | 0.018   | 1.91(0.86-4.23)  | 0.110   | 1.89(1.16-3.07) | 0.011   | 1.56(0.84-2.90) | 0.157   |
| Respiratory disease       | 1.78(1.00-3.17)        | 0.052   | 1.11(0.48-2.56)  | 0.813   | 2.77(1.70-4.50) | <0.001  | 2.73(1.51-4.96) | 0.001   |
| Gastrointestinal disease  | 1.37(0.78-2.39)        | 0.273   | -                | -       | 2.09(1.23-3.57) | 0.007   | 2.00(1.05-3.80) | 0.034   |
| Renal disease             | 2.42(1.13-5.20)        | 0.024   | 1.70(0.62-4.67)  | 0.300   | 1.62(0.81-3.24) | 0.172   | -               | -       |
| Thyroid disease           | 2.62(1.12-6.13)        | 0.026   | 2.01(0.64-6.28)  | 0.232   | 1.04(0.12-9.02) | 0.972   | -               | -       |
| Connective tissue disease | 3.62(1.42-9.28)        | 0.007   | 2.91(0.73-11.58) | 0.129   | 2.28(0.58-9.01) | 0.240   | -               | -       |
| Osteoporosis              | 2.16(1.25-3.74)        | 0.006   | 1.64(0.82-3.29)  | 0.165   | 1.87(0.72-4.87) | 0.201   | -               | -       |
| Arthritis                 | 2.25(1.29-3.90)        | 0.004   | 2.14(1.02-4.49)  | 0.043   | 2.88(1.77-4.69) | <0.001  | 2.64(1.50-4.65) | 0.001   |
| Eye disease               | 1.06(0.51-2.18)        | 0.876   | -                | -       | 1.72(0.98-3.02) | 0.059   | 1.66(0.85-3.27) | 0.139   |
| Prostate disease          | NA                     | NA      | -                | -       | 1.26(0.78-2.02) | 0.347   | -               | -       |
| Malignancy                | 3.06(1.64-5.69)        | <0.001  | 3.43(1.53-7.68)  | 0.003   | 0.84(0.48-1.46) | 0.529   | -               | -       |

The adjusted models include age, current drinking, current smoking, BMI, IADL, education (high school graduation or higher), frailty and depression. Abbreviations: BMI, body mass index; IADL, Instrumental activities of daily living

Supplementary Table 3b. Condition specific effect on low life satisfaction in female and male participants.

|                           | Low life satisfaction |         |                  |         |                  |         |                 |         |
|---------------------------|-----------------------|---------|------------------|---------|------------------|---------|-----------------|---------|
|                           | Female                |         |                  |         | Male             |         |                 |         |
|                           | Unadjusted            |         | Adjusted         |         | Unadjusted       |         | Adjusted        |         |
|                           | OR(95%CI)             | P value | OR(95%CI)        | P value | OR(95%CI)        | P value | OR(95%CI)       | P value |
| Hypertension              | 1.20(0.72-2.02)       | 0.488   | -                | -       | 0.77(0.48-1.23)  | 0.269   | -               | -       |
| Diabetes                  | 1.02(0.47-2.22)       | 0.957   | -                | -       | 1.27(0.69-2.34)  | 0.438   | -               | -       |
| Dyslipidemia              | 1.04(0.64-1.70)       | 0.861   | -                | -       | 0.92(0.56-1.51)  | 0.747   | -               | -       |
| Hyperuricemia             | 2.02(0.73-5.56)       | 0.173   | -                | -       | 0.91(0.48-1.74)  | 0.784   | -               | -       |
| Cerebrovascular disease   | 1.19(0.46-3.07)       | 0.716   | -                | -       | 1.20(0.63-2.31)  | 0.581   | -               | -       |
| Parkinson's disease       | NA                    | NA      | -                | -       | NA               | NA      | -               | -       |
| Dementia                  | 0.49(0.06-3.97)       | 0.503   | -                | -       | 0.42(0.05-3.44)  | 0.422   | -               | -       |
| Heart disease             | 0.87(0.47-1.62)       | 0.665   | -                | -       | 0.82(0.49-1.36)  | 0.446   | -               | -       |
| Respiratory disease       | 1.20(0.67-2.14)       | 0.544   | -                | -       | 0.99(0.60-1.64)  | 0.975   | -               | -       |
| Gastrointestinal disease  | 0.78(0.48-1.26)       | 0.308   | -                | -       | 1.99(1.19-3.30)  | 0.008   | 2.01(1.13-3.56) | 0.017   |
| Renal disease             | 1.36(0.59-3.15)       | 0.472   | -                | -       | 1.03(0.49-2.18)  | 0.929   | -               | -       |
| Thyroid disease           | 2.10(0.94-4.67)       | 0.070   | 1.49(0.57-3.92)  | 0.417   | 0.89(0.10-8.04)  | 0.915   | -               | -       |
| Connective tissue disease | 2.76(0.95-8.00)       | 0.061   | 2.88(0.62-13.41) | 0.177   | 2.89(0.76-11.00) | 0.119   | -               | -       |
| Osteoporosis              | 0.94(0.57-1.54)       | 0.796   | -                | -       | 1.53(0.57-4.06)  | 0.397   | -               | -       |
| Arthritis                 | 1.85(1.13-3.03)       | 0.014   | 2.04(1.14-3.66)  | 0.016   | 1.76(1.09-2.82)  | 0.020   | 1.67(0.98-2.82) | 0.058   |
| Eye disease               | 0.54(0.31-0.97)       | 0.040   | 0.37(0.19-0.73)  | 0.004   | 0.97(0.59-1.59)  | 0.898   | -               | -       |
| Prostate disease          | NA                    | NA      | -                | -       | 1.05(0.66-1.67)  | 0.825   | -               | -       |
| Malignancy                | 1.79(0.94-3.40)       | 0.074   | 1.73(0.83-3.58)  | 0.144   | 1.10(0.65-1.86)  | 0.713   | -               | -       |

The adjusted models include age, current drinking, current smoking, BMI, IADL, education (high school graduation or higher), frailty and depression. Abbreviations: BMI, body mass index; IADL, Instrumental activities of daily living
